# Supplementary material
Source: Research Square preprint supplement (doi:10.21203/rs.3.rs-9744201/v1)
Supplement: Supplementary file 1 [file e9e68a7432c70d860ed0429b.xlsx]

## Sheet: Sayfa1
Day	Forecast
1	40214.6
2	40374.2
3	40465.0
4	40516.7
5	40546.1
6	40562.8
7	40572.3
8	40577.7
9	40580.8
10	40582.6
11	40583.6
12	40584.1
13	40584.5
14	40584.6
